# Supplementary material for: Preparation and in vivo characterization of 51MnCl2 as PET tracer of Ca2+ channel-mediated transport
Source: PubMed Central journal article supplement (PMC5465055; doi:10.1038/s41598-017-03202-0), 2017-06-08
Supplement: 41598_2017_3202_MOESM1_ESM.pdf [file 41598_2017_3202_MOESM1_ESM.pdf]

## Supplementary Information

### Preparation and in vivo characterization of $^{51}\text{MnCl}_2$ as PET tracer of $\text{Ca}^{2+}$ channel-mediated transport

Stephen A. Graves<sup>1</sup>, Reinier Hernandez<sup>1</sup>, Hector F. Valdovinos<sup>1</sup>, Paul A. Ellison<sup>1</sup>, Jonathan W. Engle<sup>1</sup>, Todd E. Barnhart<sup>1</sup>, Weibo Cai<sup>1,2,3</sup>, Robert J. Nickles<sup>1\*</sup>

<sup>1</sup>Department of Medical Physics, University of Wisconsin – Madison

<sup>2</sup>Carbone Cancer Center, University of Wisconsin – Madison

<sup>3</sup>Department of Radiology, University of Wisconsin – Madison

\*Corresponding author information:

Robert J. Nickles

*rnickles@wisc.edu*

1005 WIMR, 1111 Highland Ave., Madison, WI, 53705, USA

Phone: +1 (608) 263-5805

Jonathan W. Engle

*jwengle@wisc.edu*

1005 WIMR, 1111 Highland Ave., Madison, WI, 53705, USA

Phone: +1 (608) 263-7932

---

### Supplementary Note: Fe/Mn Redox Chemistry

To determine whether  $Mn^{2+}$  and  $Fe^{2+}$  are oxidized to  $Mn^{3+}$  and  $Fe^{3+}$  under acidic conditions by the addition of  $H_2O_2$  prior to anion exchange chromatography, consider the following reactions and associated standard reduction potentials:

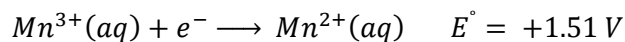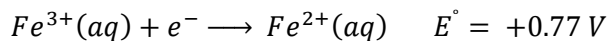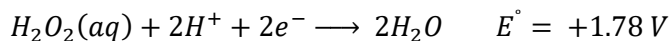

For the oxidation of  $Mn^{2+}$  by  $H_2O_2$ , we obtain:

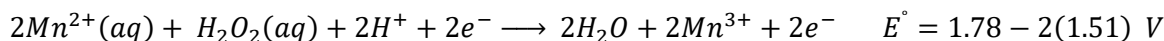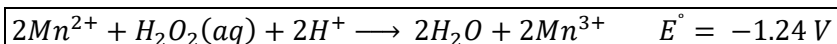

For the oxidation of  $Fe^{2+}$  by  $H_2O_2$ , we obtain:

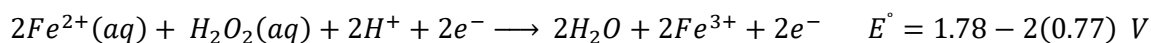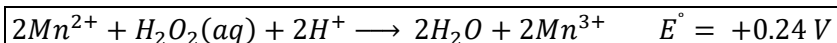

From these results, we can see that  $Mn^{2+}$  is not oxidized to  $Mn^{3+}$ , whereas the oxidation of  $Fe^{2+}$  to  $Fe^{3+}$  is spontaneous. The spontaneous oxidation of  $Fe^{2+}$  to  $Fe^{3+}$  is evidenced experimentally by a color change, from pale yellow to deep orange/brown.

| <b>Tissue</b>            | <b>Number of <sup>51</sup>Mn disintegrations<br/>(MBq-h/MBq)</b> | <b>Number of <sup>51</sup>Cr disintegrations<br/>(MBq-h/MBq)</b> |
|--------------------------|------------------------------------------------------------------|------------------------------------------------------------------|
| Adrenals                 | 0.00E+00                                                         | 0.00E+00                                                         |
| Brain                    | 4.43E-03                                                         | 3.93E+00                                                         |
| Breasts                  | 0.00E+00                                                         | 0.00E+00                                                         |
| Gallbladder Contents     | 0.00E+00                                                         | 0.00E+00                                                         |
| LLI                      | 0.00E+00                                                         | 0.00E+00                                                         |
| Small Intestine          | 0.00E+00                                                         | 0.00E+00                                                         |
| Stomach                  | 0.00E+00                                                         | 1.23E+01                                                         |
| ULI                      | 6.42E-03                                                         | 5.70E+00                                                         |
| Heart Contents           | 0.00E+00                                                         | 0.00E+00                                                         |
| Heart Wall               | 2.37E-02                                                         | 2.10E+01                                                         |
| Kidneys                  | 6.91E-02                                                         | 6.12E+01                                                         |
| Liver                    | 6.30E-02                                                         | 5.58E+01                                                         |
| Lungs                    | 1.68E-02                                                         | 1.49E+01                                                         |
| Muscle                   | 2.18E-03                                                         | 1.93E+00                                                         |
| Ovaries                  | 0.00E+00                                                         | 0.00E+00                                                         |
| Pancreas                 | 4.11E-02                                                         | 3.64E+01                                                         |
| Red Marrow               | 0.00E+00                                                         | 0.00E+00                                                         |
| Cortical Bone            | 8.40E-04                                                         | 7.48E-01                                                         |
| Trabecular Bone          | 0.00E+00                                                         | 0.00E+00                                                         |
| Spleen                   | 9.16E-03                                                         | 8.12E+00                                                         |
| Testes                   | 0.00E+00                                                         | 0.00E+00                                                         |
| Thymus                   | 0.00E+00                                                         | 0.00E+00                                                         |
| Thyroid                  | 0.00E+00                                                         | 0.00E+00                                                         |
| Urinary Bladder Contents | 0.00E+00                                                         | 0.00E+00                                                         |
| Uterus/Uterine Wall      | 0.00E+00                                                         | 0.00E+00                                                         |
| Total Body               | 8.70E-01                                                         | 7.20E+02                                                         |

**Table S1.** Source organ integrated disintegrations for <sup>51</sup>Mn and <sup>51</sup>Cr used in OLINDA dose calculations.

| Time (min) | Heart (SUV)  | Liver (SUV)  | Kidneys (SUV) | Muscle (SUV) | Pancreas (SUV) | Salivary gland (SUV) |
|------------|--------------|--------------|---------------|--------------|----------------|----------------------|
| 0.04       | 0.00 ± 0.00  | 0.00 ± 0.00  | 0.00 ± 0.00   | 0.00 ± 0.00  | 0.00 ± 0.00    | 0.00 ± 0.00          |
| 0.13       | 0.00 ± 0.00  | 0.00 ± 0.00  | 0.00 ± 0.00   | 0.00 ± 0.00  | 0.00 ± 0.00    | 0.00 ± 0.00          |
| 0.21       | 2.73 ± 0.58  | 1.32 ± 0.50  | 0.04 ± 0.05   | 0.00 ± 0.00  | 0.00 ± 0.00    | 0.00 ± 0.00          |
| 0.29       | 14.48 ± 0.53 | 6.73 ± 2.32  | 3.62 ± 0.03   | 0.00 ± 0.00  | 1.56 ± 0.35    | 0.90 ± 0.35          |
| 0.38       | 13.12 ± 1.58 | 7.21 ± 1.90  | 6.91 ± 0.63   | 0.26 ± 0.36  | 3.13 ± 0.22    | 2.93 ± 1.57          |
| 0.46       | 9.48 ± 0.58  | 6.99 ± 1.17  | 8.41 ± 0.85   | 0.46 ± 0.63  | 3.63 ± 0.07    | 2.97 ± 0.70          |
| 0.54       | 7.47 ± 0.06  | 7.33 ± 0.67  | 9.69 ± 1.36   | 0.39 ± 0.53  | 4.43 ± 0.42    | 3.32 ± 0.87          |
| 0.63       | 6.16 ± 0.24  | 7.49 ± 0.51  | 10.53 ± 1.61  | 0.41 ± 0.52  | 4.71 ± 0.03    | 3.08 ± 0.89          |
| 0.71       | 5.27 ± 0.20  | 7.50 ± 0.30  | 10.75 ± 1.30  | 0.36 ± 0.46  | 5.08 ± 0.12    | 2.83 ± 0.45          |
| 0.79       | 4.59 ± 0.19  | 7.97 ± 0.38  | 11.02 ± 1.27  | 0.32 ± 0.40  | 5.28 ± 0.72    | 3.14 ± 0.65          |
| 0.88       | 4.63 ± 0.24  | 7.98 ± 0.34  | 11.18 ± 1.26  | 0.26 ± 0.31  | 5.06 ± 0.09    | 3.18 ± 0.83          |
| 0.96       | 4.46 ± 0.31  | 8.33 ± 0.11  | 11.65 ± 1.32  | 0.20 ± 0.25  | 5.31 ± 0.50    | 3.16 ± 0.14          |
| 1.08       | 3.88 ± 0.41  | 8.34 ± 0.16  | 11.94 ± 1.55  | 0.49 ± 0.35  | 5.14 ± 0.32    | 2.57 ± 0.24          |
| 1.25       | 3.72 ± 0.25  | 8.70 ± 0.13  | 12.21 ± 1.83  | 0.45 ± 0.31  | 5.53 ± 0.43    | 2.81 ± 0.14          |
| 1.42       | 3.79 ± 0.60  | 9.27 ± 0.24  | 12.72 ± 1.45  | 0.45 ± 0.35  | 5.72 ± 1.06    | 2.94 ± 0.41          |
| 1.58       | 3.71 ± 0.46  | 9.10 ± 0.17  | 12.57 ± 1.42  | 0.47 ± 0.41  | 5.78 ± 0.50    | 2.73 ± 0.18          |
| 1.75       | 3.73 ± 0.45  | 9.57 ± 0.07  | 12.67 ± 1.51  | 0.38 ± 0.34  | 6.02 ± 0.54    | 2.66 ± 0.20          |
| 1.92       | 3.92 ± 0.55  | 10.06 ± 0.32 | 13.06 ± 1.68  | 0.48 ± 0.26  | 6.14 ± 1.41    | 2.71 ± 0.39          |
| 2.25       | 3.81 ± 0.41  | 10.01 ± 0.29 | 12.89 ± 1.73  | 0.50 ± 0.17  | 6.19 ± 0.61    | 2.58 ± 0.20          |
| 2.75       | 3.78 ± 0.41  | 10.23 ± 0.46 | 13.16 ± 1.93  | 0.48 ± 0.11  | 6.20 ± 0.59    | 2.56 ± 0.24          |
| 3.25       | 3.79 ± 0.36  | 10.37 ± 0.49 | 13.01 ± 1.68  | 0.44 ± 0.11  | 6.38 ± 0.53    | 2.58 ± 0.03          |
| 3.75       | 3.65 ± 0.29  | 10.46 ± 0.58 | 13.20 ± 1.95  | 0.43 ± 0.08  | 5.98 ± 0.79    | 2.58 ± 0.06          |
| 4.25       | 3.80 ± 0.33  | 10.51 ± 0.61 | 13.15 ± 1.88  | 0.49 ± 0.11  | 6.30 ± 0.81    | 2.65 ± 0.04          |
| 4.75       | 3.83 ± 0.44  | 10.53 ± 0.66 | 13.02 ± 1.88  | 0.44 ± 0.10  | 6.40 ± 1.22    | 2.69 ± 0.15          |
| 5.50       | 3.96 ± 0.38  | 10.77 ± 0.84 | 12.97 ± 1.90  | 0.41 ± 0.12  | 6.38 ± 0.79    | 2.60 ± 0.31          |
| 6.50       | 4.10 ± 0.31  | 11.11 ± 1.14 | 13.13 ± 2.08  | 0.42 ± 0.15  | 6.48 ± 1.05    | 2.57 ± 0.21          |
| 7.50       | 4.20 ± 0.12  | 11.24 ± 1.30 | 12.95 ± 2.09  | 0.42 ± 0.11  | 6.49 ± 1.21    | 2.65 ± 0.02          |
| 8.50       | 4.37 ± 0.10  | 11.26 ± 1.41 | 12.85 ± 1.98  | 0.43 ± 0.15  | 6.43 ± 0.63    | 2.75 ± 0.01          |
| 9.50       | 4.43 ± 0.09  | 11.47 ± 1.40 | 13.09 ± 2.21  | 0.42 ± 0.14  | 6.56 ± 0.96    | 2.69 ± 0.03          |
| 10.50      | 4.51 ± 0.03  | 11.44 ± 1.32 | 12.97 ± 2.25  | 0.42 ± 0.14  | 6.65 ± 1.18    | 2.67 ± 0.20          |
| 11.50      | 4.49 ± 0.07  | 11.35 ± 1.44 | 12.92 ± 2.21  | 0.40 ± 0.14  | 6.75 ± 1.16    | 2.67 ± 0.08          |
| 12.50      | 4.53 ± 0.03  | 11.50 ± 1.55 | 13.00 ± 2.32  | 0.40 ± 0.11  | 6.58 ± 1.06    | 2.60 ± 0.02          |
| 13.50      | 4.50 ± 0.05  | 11.51 ± 1.43 | 13.13 ± 2.30  | 0.44 ± 0.11  | 6.52 ± 1.12    | 2.69 ± 0.03          |
| 14.50      | 4.56 ± 0.05  | 11.41 ± 1.38 | 13.02 ± 2.31  | 0.41 ± 0.12  | 6.59 ± 0.90    | 2.76 ± 0.14          |
| 16.25      | 4.59 ± 0.07  | 11.53 ± 1.46 | 13.17 ± 2.39  | 0.40 ± 0.14  | 6.62 ± 0.84    | 2.64 ± 0.17          |
| 18.75      | 4.59 ± 0.01  | 11.59 ± 1.45 | 13.20 ± 2.47  | 0.39 ± 0.14  | 6.52 ± 0.86    | 2.73 ± 0.20          |
| 21.25      | 4.61 ± 0.07  | 11.71 ± 1.51 | 13.38 ± 2.43  | 0.41 ± 0.12  | 6.58 ± 0.80    | 2.77 ± 0.18          |
| 23.75      | 4.68 ± 0.02  | 11.74 ± 1.57 | 13.42 ± 2.49  | 0.42 ± 0.13  | 6.46 ± 0.89    | 2.77 ± 0.19          |
| 26.25      | 4.73 ± 0.01  | 11.81 ± 1.65 | 13.40 ± 2.38  | 0.40 ± 0.15  | 6.49 ± 0.56    | 2.69 ± 0.10          |
| 28.75      | 4.72 ± 0.06  | 11.89 ± 1.64 | 13.55 ± 2.33  | 0.40 ± 0.16  | 6.60 ± 0.58    | 2.77 ± 0.05          |
| 31.25      | 4.72 ± 0.02  | 12.02 ± 1.75 | 13.65 ± 2.50  | 0.42 ± 0.14  | 6.62 ± 0.58    | 2.75 ± 0.16          |
| 33.75      | 4.72 ± 0.02  | 12.06 ± 1.73 | 13.74 ± 2.59  | 0.40 ± 0.13  | 6.67 ± 0.47    | 2.69 ± 0.13          |

**Table S2.** Tabulated time activity curves (TACs) measured by dynamic PET for isoflurane anaesthetized ICR mice (n=2) injected with a rapid intravenous bolus of  $^{51}\text{MnCl}_2$ . ROIs were hand-drawn on composite images and applied to all frames. Values represent mean  $\pm$  SD. A heart blood clearance half-life of  $7.7 \pm 0.7$  s was measured by weighted exponential least-squares regression.

| <b>Tissue</b>  | <b>Uptake (SUV)</b> |
|----------------|---------------------|
| Heart          | 3.53 ± 0.25         |
| Liver          | 4.63 ± 0.91         |
| Kidney         | 7.70 ± 1.06         |
| Muscle         | 0.47 ± 0.07         |
| Pancreas       | 5.93 ± 0.93         |
| Salivary Gland | 3.90 ± 0.75         |

**Table S3.** <sup>51</sup>Mn uptake in non-anaesthetized ICR mice (n=3) 1 hour following a rapid intravenous bolus of <sup>51</sup>MnCl<sub>2</sub>, quantified by hand-drawn static PET ROIs.

| <b>Tissue</b>  | <b>Uptake (SUV)</b> |
|----------------|---------------------|
| Blood          | 0.09 ± 0.02         |
| Skin           | 0.28 ± 0.06         |
| Muscle         | 0.45 ± 0.16         |
| Bone           | 0.52 ± 0.11         |
| Heart          | 5.64 ± 1.75         |
| Lung           | 2.57 ± 1.28         |
| Liver          | 3.66 ± 0.78         |
| Kidney         | 9.23 ± 0.70         |
| Spleen         | 1.62 ± 0.18         |
| Pancreas       | 7.03 ± 1.28         |
| Stomach        | 2.47 ± 1.43         |
| Intestine      | 3.37 ± 2.84         |
| Tail           | 0.12 ± 0.10         |
| Brain          | 0.38 ± 0.03         |
| Salivary Gland | 3.18 ± 1.30         |

**Table S4.** <sup>51</sup>Mn uptake in ICR mice immediately following PET imaging (~90 min post-injection), quantified by *ex vivo* gamma counting.
